# Supplementary material for: Effects of Ground Cover Management, Landscape Elements and Local Conditions on Carabid (Coleoptera: Carabidae) Diversity and Vine Vitality in Temperate Vineyards
Source: MDPI journal article supplement (doi:10.3390/agronomy12061328), 2022-05-30
Supplement: s1 [file s1]

Archive with 2 entries (2 files):
- Porter et al_supplementary figures_submission.pdf
- Porter et al_supplementary tables_submission.xlsx
