# Supplementary material for: Effects of Ground Cover Management, Landscape Elements and Local Conditions on Carabid (Coleoptera: Carabidae) Diversity and Vine Vitality in Temperate Vineyards
Source: MDPI journal article supplement (doi:10.3390/agronomy12061328), 2022-05-30
Supplement: s1 [file s1 › Porter et al_supplementary figures_submission.pdf]

**Supplementary Material.**

# **Effects of ground cover management, landscape elements and local conditions on carabid (Coleoptera: Carabidae) diversity and vine vitality in temperate vineyards**

Lauren Porter <sup>1</sup>, Sarhan Kahlil <sup>1</sup>, Astrid Forneck <sup>1</sup>, Silvia Winter <sup>2</sup> and Michaela Griesser <sup>1,\*</sup>

Journal: Agronomy

(\*) Corresponding author. Michaela Griesser, University of Natural Resources and Life Sciences, Vienna,

Department of Crop Sciences, Institute of Viticulture and Pomology, Konrad Lorenz Strasse 24, 3430

Tulln, Austria, Michaela.griesser@boku.ac.at

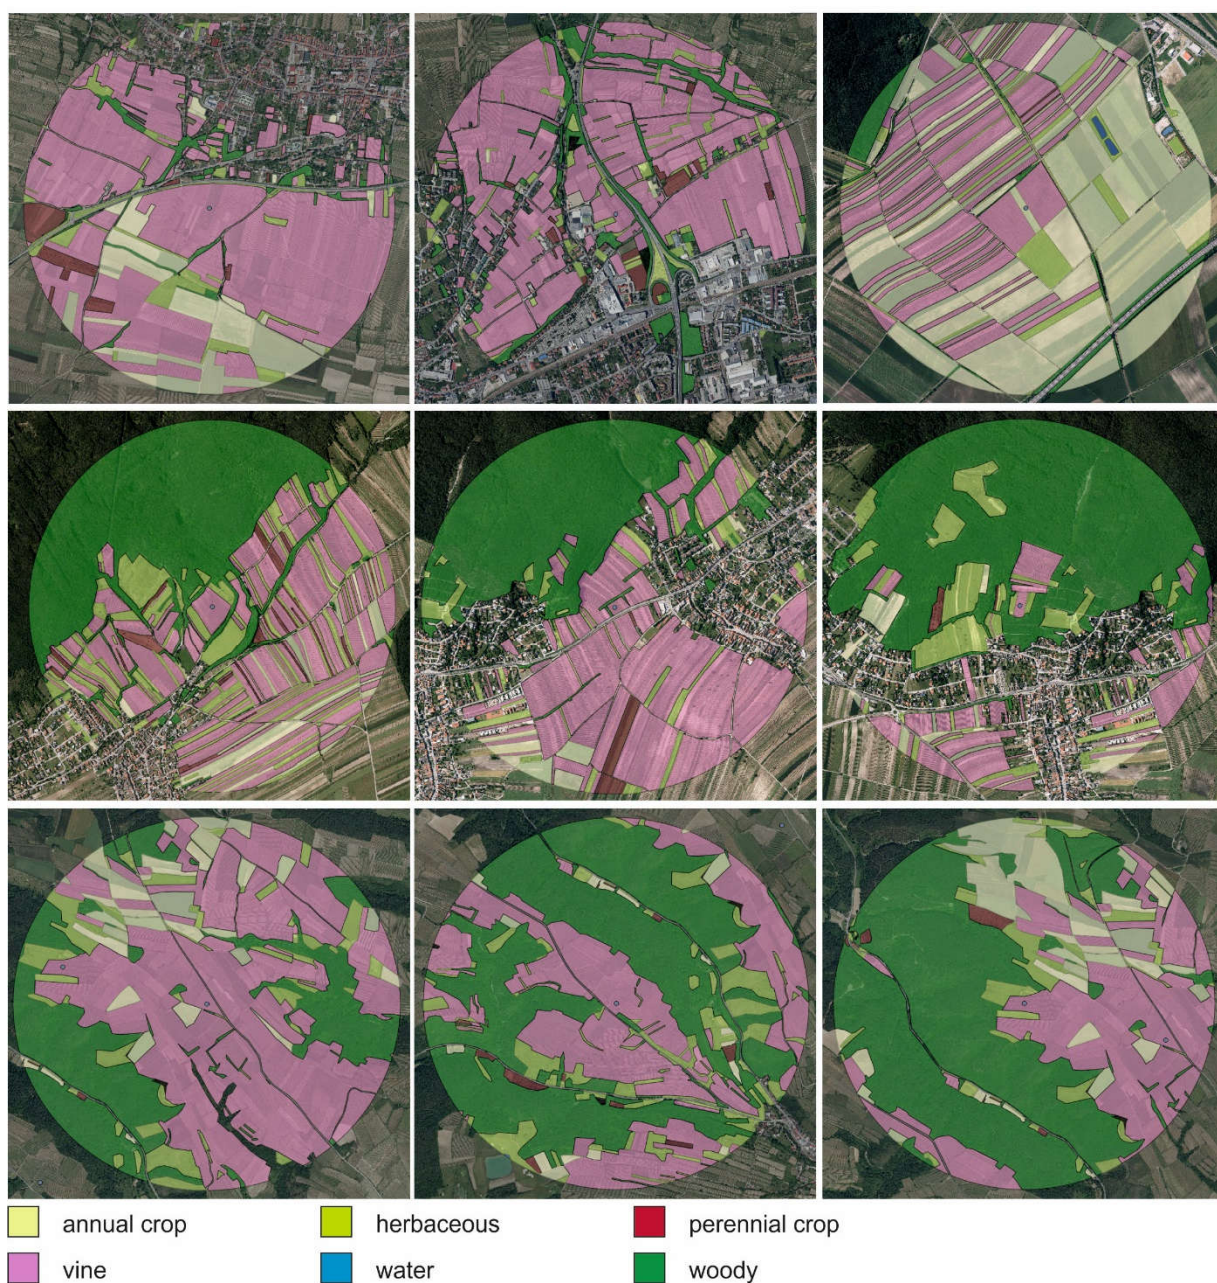

**Figure S1.** QGIS analyses of landscape elements within a 1 km radius of the experimental vineyards (A01-A09) as determined from ortho-images. Analyzed landscape elements: vineyards, annual crops, perennial crops, woody habitat, herbaceous habitat and water. Woody: wood area and tree alleys between vineyards or crop field; Herbaceous habitat: natural and semi-natural pastures and meadows; Annual crops: cereals, other annual crops; Perennial crops: orchards, asparagus; Vine: vineyards.
