# Supplementary material for: Effects of Ground Cover Management, Landscape Elements and Local Conditions on Carabid (Coleoptera: Carabidae) Diversity and Vine Vitality in Temperate Vineyards
Source: MDPI journal article supplement (doi:10.3390/agronomy12061328), 2022-05-30
Supplement: s1 [file s1 › Porter et al_supplementary tables_submission.xlsx]

## Sheet: Table S1
Table S1: Description of site locations of the experimental vineyards. Data include vineyard names, vineyard location in Austria, farm manager, age of vineyards, grapevine variety grafted on rootstock as well as environmental factors as soil type and the mean precipitation and mean temperature per year.
Vineyard Code	Vineyard Location	Farm Manager	Age of Vineyard	Grape Variety - Rootstock	Soil Type	Mean Precipitation (2015-2017)	Mean Annual Temperature (°C)
AT01	Langenlois	Farmer 1 - Lower Austria	9	Pinot Noir (PN) - Kober 5BB	silty loam	487	11.2
AT02	Sandgrube	Farmer 1 - Lower Austria	10	Rheinriesling (RR) - Kober 5BB	silty loam	487	11.2
AT03	Föllig	Farmer 2 - Burgenland	29	Zweigelt (ZW) - Kober 5BB	silty loam	567	12
AT04	St.Georgen	Farmer 2 - Burgenland	15	Merlot (Mer) - Kober 5BB	medium loam	567	12
AT05	Lunzerrried	Farmer 3 - Burgenland	16	Cabernet Sauvignon (CS) - Kober 5BB	silty loam	567	12
AT06	Dürräcker	Farmer 3 - Burgenland	9	Pinot Noir (PN) - Fercal	clay loam	567	12
AT07	Gemeindespitz	Farmer 4 - Lower Austria	22	Grüner Veltliner (GV) - Kober 5BB	sandy loam	487	11.2
AT08	Faiglloiser	Farmer 4 - Lower Austria	17	Grüner Veltliner (GV) - Kober 5BB	sandy loam	487	11.2
AT09	Diernitz	Farmer 4 - Lower Austria	14	Grüner Veltliner (GV) - Kober 5BB	medium loam	487	11.2

## Sheet: Table S2
Table S2: QGIS analysis of ortho-images. Percentage of vineyard area, percentage of woody area (wood area and tree alleys between vineyards or crop field), percentage of semi-natural habitats (summary of woody and herbaceous habitats, representing pastures and meadows) was calculated to be used in follow-up analyses. Additionally, the minimal distance to the herbaceous habitats and woody habitats…
	% Vineyards	% Woody area	% Semi-natural habitats	Minimal distance herbaceous habitats (m)	Minimal distance to woody habitats (m)
AT01	54.1	3	7.7	132.5	160.3
AT02	48.3	7.4	12.3	20.2	71.3
AT03	29.5	4.2	10.6	140.5	129.4
AT04	32.9	36.6	51.2	66.3	86.6
AT05	35.9	29.2	34.5	106.2	29.1
AT06	12.2	46.2	56.6	25.6	50.2
AT07	53.4	27	35.7	60.5	32
AT08	34.9	48.3	59.7	63.6	49.2
AT09	28.5	49.4	55.6	38.4	90.8

## Sheet: Table S3
Table S3. Results of soil chemical and physical analysis. Soil covariates determined from soil samples collected in 2016 in all experiment vineyards within the current study. The presented values are mean values with standard deviations of the results obtained in all experimental plots (2 plots per vineyard and treatment, N = 54).
			Soil texture			Soil chemical parameters
vineyard	variety	soil type	% sand	% silt	% clay	CaCO3 content (%)	C total (%)	C organic (%)	SOM (%)	N total (%)	CN ratio	pH value	P2O5 content (mg 100 g-1 dry soil)	K2O content (mg 100 g-1 dry soil)	Mg content (mg 100 g-1 dry soil)	Cu content (mg kg-1 dry soil)
AT01	PN	silty loam	12.4 ± 0.5	70.4 ± 1.2	17.2 ± 1.2	1.7 ± 0.3	4.8 ± 0.2	4.6 ± 0.3	8.0 ± 0.4	0.2 ± 0.0	30.9 ± 2.3	7.5 ± 0.1	27.7 ± 3.3	59.9 ± 7.6	13.9 ± 1.3	1.7 ± 0.2
AT02	RR	silty loam	22.4 ± 2.9	61.3 ± 3.6	16.3 ± 0.7	1.6 ± 0.2	4.3 ± 0.2	4.1 ± 0.2	7.0 ± 0.3	0.1 ± 0.0	32.3 ± 2.1	7.5 ± 0.1	66.8 ± 7.9	40.0 ± 4.4	13.5 ± 1.0	22.1 ± 24.1
AT03	ZW	silty loam	27.2 ± 0.8	46.7 ± 0.8	26.1 ± 1.3	1.0 ± 0.2	3.1 ± 0.4	3.0 ± 0.4	5.2 ± 0.6	0.2 ± 0.0	16.1 ± 2.1	7.4 ± 0.1	17.9 ± 3.5	32.1 ± 3.2	20.3 ± 1.9	9.8 ± 1.0
AT04	Mer	medium loam	45.0 ± 2.9	37.4 ± 3.8	17.6 ± 1.7	1.1 ± 0.1	2.9 ± 0.6	2.8 ± 0.6	4.7 ± 1.0	0.1 ± 0.0	26.7 ± 11.7	7.4 ± 0.1	18.9 ± 6.0	12.4 ± 3.2	11.2 ± 1.3	21.8 ± 7.2
AT05	CS	silty loam	20.8 ± 1.8	60.4 ± 1.7	18.8 ± 0.7	1.0 ± 0.1	3.1 ± 0.3	3.0 ± 0.3	5.2 ± 0.6	0.2 ± 0.0	16.5 ± 1.2	7.4 ± 0.1	36.7 ± 5.7	36.9 ± 7.6	13.6 ± 1.1	88.3 ± 12.2
AT06	PN	clay loam	35.2 ± 3.9	35.1 ± 2.6	29.7 ± 2.0	1.4 ± 0.2	7.5 ± 0.4	7.4 ± 0.4	12.7 ± 0.8	0.3 ± 0.0	24.7 ± 2.7	7.4 ± 0.1	38.7 ± 6.9	68.8 ± 14.2	12.0 ± 1.7	45.1 ± 15.4
AT07	GV	sandy loam	61.9 ± 2.0	31.4 ± 2.4	6.7 ± 0.3	0.3 ± 0.3	2.7 ± 0.6	2.7 ± 0.5	4.6 ± 0.9	0.2 ± 0.0	12.8 ± 0.5	6.9 ± 0.1	52.2 ± 11.0	73.3 ± 15.0	17.4 ± 3.1	23.9 ± 5.0
AT08	GV	sandy loam	68.3 ± 1.3	23.7 ± 1.1	8.0 ± 0.6	0.7 ± 0.1	3.2 ± 0.4	3.1 ± 0.4	5.3 ± 0.7	0.2 ± 0.1	12.6 ± 1.2	7.2 ± 0.1	74.0 ± 18.4	78.5 ± 24.3	22.9 ± 3.7	43.3 ± 21.8
AT09	GV	sandy loam	53.6 ± 4.9	30.5 ± 1.3	15.9 ± 4.5	0.2 ± 0.2	2.3 ± 0.6	2.3 ± 0.6	3.9 ± 1.1	0.2 ± 0.1	11.1 ± 0.5	6.8 ± 0.1	41.1 ± 11.4	83.8 ± 23.3	33.6 ± 5.2	27.5 ± 3.2

## Sheet: Table S4
Table S3. Metadata , site and environmental explanatory variables used in the statistical analysis and their shortcuts used in the R code used for building the most parsimonious GLMMs. Means ± SD are given for continuous variables per treatment. All variables not indicated as used in a final model were removed from analysis due to collinearity. n.a. not applicable.
	Variable type	Variable name	Information/Unit	Bare ground and tillage (BG)	Alternating vegetation cover (AC)	Complete vegetation cover (CC)	Included within GLMM variables
General metadata	Vineyard ID	vineyard_id	AT01-AT09	n.a.	n.a.	n.a.	as random variable
	Year	year	2016 - 2017	n.a.	n.a.	n.a.	as random variable
	Inter-row number	row_id	1-54	n.a.	n.a.	n.a.
	Organic vs. conventional regulation	management	0 - conventional, 1 - organic as a factor	n.a.	n.a.	n.a.
	Sampling time-point	session	June, September as a factor	n.a.	n.a.	n.a.
	Winegrower/Vineyard manager	farmer_code	1-4	n.a.	n.a.	n.a.
	Ground cover management/Treatment	treatment	BG (bare ground), AC (alternating cover), CC (complete cover)	n.a.	n.a.	n.a.
Climate variables	Avarage daily air temperature	avg_airtemp	°C	18.08 ± 0.54	18.08 ± 0.54	18.08 ± 0.54
	Max daily air temperature	avg_maxairtemp	°C	30.68 ± 0.31	30.68 ± 0.31	30.68 ± 0.31
	Min daily air temperature	avg_minairtemp	°C	7.48 ± 1.24	7.48 ± 1.24	7.48 ± 1.24
	Millimeters of fog measured within the month	fog_mm	mm	68.31 ± 26.54	68.31 ± 26.54	68.31 ± 26.54
	Sunshine hours within the month	sun_h	h	248.83 ± 22.09	248.83 ± 22.09	248.83 ± 22.09
Landscape variables (1 km radius)	Percentage vineyard area	vine_perc	%	36.63 ± 12.89	36.63 ± 12.89	36.63 ± 12.89
	Percentage woody area	woody_perc	%	27.92 ± 18.18	27.92 ± 18.18	27.92 ± 18.18
	Percentage semi-natural habitats (woody and herbaceous areas)	SNH_perc	%	35.99 ± 20.32	35.99 ± 20.32	35.99 ± 20.32
	Minimum distance to a herbaceous area	herb_MinDis	m	72.64 ± 42.38	72.64 ± 42.38	72.64 ± 42.38
	Minimum distance to a woody area	woody_MinDis	m	77.66 ± 42.5	77.66 ± 42.5	77.66 ± 42.5
Soil variables	Percentage of CaCO3	CaCO3	%	1.05 ± 0.56	0.96 ± 0.49	0.96 ± 0.55
	Percentage of inorganic carbon	C_anorg_perc	%	0.13 ± 0.07	0.12 ± 0.06	0.12 ± 0.07
	Percentage of total carbon	C_tot_perc	%	3.55 ± 1.62	3.64 ± 1.54	3.95 ± 1.65
	Percentage of ogranic carbon	C_org_perc	%	3.43 ± 1.58	3.53 ± 1.51	3.83 ± 1.62
	Percentage of soil organic matter	SOM_perc	%	5.9 ± 2.71	6.06 ± 2.6	6.59 ± 2.78
	Percentag total soil nitrogen content	N_tot_perc	%	0.17 ± 0.06	0.19 ± 0.06	0.21 ± 0.08
	C:N ratio	CN		22.06 ± 11.12	19.2 ± 7.24	20.02 ± 8.29
	soil phosphor content	P2O5	mg 100 g-1 dry soil	40.37 ± 25.72	39.07 ± 14.57	44.68 ± 24.05
	soil potassium content	K2O	mg 100 g-1 dry soil	46.71 ± 20.43	52.36 ± 23.14	59.47 ± 31.61
	soil magensium content	Mg	mg 100 g-1 dry soil	17.98 ± 9.27	16.19 ± 4.47	18.87 ± 8.17
	soil copper content	Cu	mg kg -1 dry soil	29.29 ± 25.1	29.29 ± 25.23	35.94 ± 30.21
	soil texture - percentage sand	sand_percent	%	37.74 ± 17.89	38.02 ± 19.44	39.87 ± 19.58
	soil texture - percentage silt	silt_percent	%	44.23 ± 14.99	44.82 ± 15.91	43.23 ± 16.55
	soil texture - percentage clay	clay_percent	%	18.03 ± 6.9	17.16 ± 7.73	16.9 ± 7.15
	soil pH	pH		7.33 ± 0.25	7.3 ± 0.29	7.28 ± 0.25
Mesofauna biodiversity	Mesofauna total abundance	mesofauna_abundance	counts, log10counts	66.78 ± 83.96, 1.57 ± 0.48	97.97 ± 127.57, 1.61 ± 0.63	81.97 ± 72.65, 1.77 ± 0.35
	Acari abundance	acari	counts, log10counts	43.44 ± 66.1, 1.28 ± 0.57	62.44 ± 85.61, 1.35 ± 0.67	44.75 ± 42.96, 1.46 ± 0.45
	Collembola abundance	collembola	counts, log10counts	12.14 ± 16.67	22.19 ± 37.42	23.11 ± 30.38

## Sheet: Table S5
Table S5. Counts of carabid beetle species in June, September 2016 and as total across all vineyards and treatments.
Carabid beetle species	Abbreviation	June	September	Total
Harpalus rufipes (De Geer, 1774)	HarRuf	20	302	322
Calathus fuscipes (Goeze, 1777)	CalFus	11	142	153
Harpalus griseus (Panzer, 1796)	HarGri	3	109	112
Brachinus crepitans (Linné, 1758)	BraCre	86	1	87
Amara aenea (De Geer, 1774)	AmaAen	54	2	56
Harpalus distinguendus (Duftschmid, 1812)	HarDis	52	2	54
Nebria brevicollis (Fabricius, 1792)	NebBre	43	7	50
Ophonus azureus (Fabricius, 1775)	OphAzu	49	0	49
Calathus ambiguus (Bonelli, 1810)	CalAmb	2	39	41
Harpalus tardus (Panzer, 1797)	HarTar	32	2	34
Harpalus dimidiatus (Bonelli, 1810)	HarDim	33	0	33
Bembidion lampros (Herbst, 1784)	BemLam	26	2	28
Harpalus calceatus (Duftschmid, 1812)	HarCal	14	11	25
Harpalus affinis (Schrank, 1781)	HarAff	22	0	22
Anisodactylus binotatus (Fabricius, 1787)	AniBin	15	0	15
Harpalus serripes (Quensel in Schonherr, 1806)	HarSer	11	0	11
Anchomenus dorsalis (Pontoppidan, 1763)	AncDor	8	0	8
Calathus erratus (C.R. Sahlberg, 1827)	CalErr	1	7	8
Pterostichus melanarius (Schaller, 1783)	PteMel	7	0	7
Trechus quadristriatus (Clairville, 1806)	TreQua	3	2	5
Broscus cephalotes (Linnaeus, 1758)	BroCep	4	0	4
Harpalus pumilus (Sturm, 1818)	HarPum	4	0	4
Poecilus cupreus (Linnaeus, 1758)	PoeCup	2	2	4
Notiophilus aquaticus (Duméril, 1806)	NotAqu	3	0	3
Poecilus lepidus (Leske, 1785)	PoeLep	3	0	3
Harpalus honestus (Duftschmid, 1812)	HarHon	2	0	2
Syntomus truncatellus (Linnaeus, 1761)	SynTru	1	1	2
Abax parallelepipedus (Piller & Mitterpacher, 1783)	AbaPar	0	1	1
Acupalpus meridianus (Linnaeus, 1760)	AcuMer	1	0	1
Asaphidion flavipes (Linnaeus, 1760)	AsaFla	1	0	1
Bembidion quadrimaculatum (Linnaeus, 1761)	BemQua	0	1	1
Calathus micropterus (Bonelli, 1810)	CalMic	0	1	1
Leistus ferrugineus (Linnaeus, 1758)	LeiFer	0	1	1
Syntomus pallipes (Dejean, 1825)	SynPal	1	0	1
Zabrus tenebrioides (Goeze, 1777)	ZabTen	0	1	1
Sum		514	636	1150

## Sheet: Table S6
Table S6. Counts of carabid beetle species collected in pitfall traps associated to the three different inter-row ground cover managment treatments (BG: bare ground by soil tillage, AC: alternating vegetation cover, CC: complete vegetation cover). Additionally, the percentage of each individual carabid species in relation to the treatments was calculated. N=54 pitfall traps collected twice, in Ju…
	Counts of individuals			Percentage of carabid species detected in inter-row cover treatments
Carbid species ≥ 3 individuals	BG	AC	CC	BG	AC	CC
AmaAen	21	25	10	37.5	44.6429	17.8571
AncDor	1	5	2	12.5	62.5	25
AniBin	3	10	2	20	66.6667	13.3333
BemLam	11	4	13	39.2857	14.2857	46.4286
BraCre	37	33	17	42.5287	37.931	19.5402
BrosCep	1	0	3	25	0	75
CalAmb	20	18	3	48.7805	43.9024	7.31707
CalErr	2	4	2	25	50	25
CalFus	40	62	51	26.1438	40.5229	33.3333
HarAff	5	12	5	22.7273	54.5455	22.7273
HarCal	14	8	3	56	32	12
HarDim	4	16	13	12.1212	48.4848	39.3939
HarDis	12	24	18	22.2222	44.4444	33.3333
HarGri	76	22	14	67.8571	19.6429	12.5
HarPum	1	2	1	25	50	25
HarRuf	134	139	49	41.6149	43.1677	15.2174
HarSer	0	5	6	0	45.4545	54.5455
HarTar	9	17	8	26.4706	50	23.5294
NebBre	13	27	10	26	54	20
OphAzu	18	18	13	36.7347	36.7347	26.5306
PoeCup	1	2	1	25	50	25
PteMel	0	5	2	0	71.4286	28.5714
TreQua	3	1	1	60	20	20
Sum	426	459	247

## Sheet: Table S7
Table S7. Counts of carabid beetle species collected in pitfall traps in each study vineyard independent of the inter-row management treatment. Additionally the percentage of each individual carabid species for each vineyard was calculated. N = 54 pitfall traps collected twice, in June and September 2016.
	Counts of individuals									Percentage of carabid species detected in each vineyard
Carbid species ≥ 3 individuals	AT01	AT02	AT03	AT04	AT05	AT06	AT07	AT08	AT09	AT01	AT02	AT03	AT04	AT05	AT06	AT07	AT08	AT09
AmaAen	2	8	2	4	0	3	9	17	11	3.57143	14.2857	3.57143	7.14286	0	5.35714	16.0714	30.3571	19.6429
AncDor	0	0	0	0	0	1	5	0	2	0	0	0	0	0	12.5	62.5	0	25
AniBin	0	0	5	3	0	6	0	0	1	0	0	33.3333	20	0	40	0	0	6.66667
BemLam	22	0	0	0	0	0	4	1	1	78.5714	0	0	0	0	0	14.2857	3.57143	3.57143
BraCre	2	0	3	1	0	22	16	16	27	2.29885	0	3.44828	1.14943	0	25.2874	18.3908	18.3908	31.0345
BrosCep	0	0	3	0	0	0	1	0	0	0	0	75	0	0	0	25	0	0
CalAmb	5	11	0	3	0	0	11	7	4	12.1951	26.8293	0	7.31707	0	0	26.8293	17.0732	9.7561
CalErr	2	5	0	0	0	0	1	0	0	25	62.5	0	0	0	0	12.5	0	0
CalFus	3	12	13	17	5	24	32	25	22	1.96078	7.84314	8.49673	11.1111	3.26797	15.6863	20.915	16.3399	14.3791
HarAff	1	3	12	0	2	0	0	1	3	4.54545	13.6364	54.5455	0	9.09091	0	0	4.54545	13.6364
HarCal	0	0	13	10	0	0	1	1	0	0	0	52	40	0	0	4	4	0
HarDim	0	1	5	12	0	14	0	0	1	0	3.0303	15.1515	36.3636	0	42.4242	0	0	3.0303
HarDis	8	5	3	2	4	11	4	4	13	14.8148	9.25926	5.55556	3.7037	7.40741	20.3704	7.40741	7.40741	24.0741
HarGri	1	1	1	103	1	2	3	0	0	0.892857	0.892857	0.892857	91.9643	0.892857	1.78571	2.67857	0	0
HarPum	0	0	1	1	0	0	0	2	0	0	0	25	25	0	0	0	50	0
HarRuf	2	19	168	71	7	13	16	9	17	0.621118	5.90062	52.1739	22.0497	2.17391	4.03727	4.96894	2.79503	5.2795
HarSer	0	0	9	2	0	0	0	0	0	0	0	81.8182	18.1818	0	0	0	0	0
HarTar	2	3	6	6	1	1	5	10	0	5.88235	8.82353	17.6471	17.6471	2.94118	2.94118	14.7059	29.4118	0
NebBre	1	0	0	0	0	0	11	11	27	2	0	0	0	0	0	22	22	54
OphAzu	1	3	12	14	3	2	9	1	4	2.04082	6.12245	24.4898	28.5714	6.12245	4.08163	18.3673	2.04082	8.16327
PoeCup	1	0	0	0	0	0	0	0	3	25	0	0	0	0	0	0	0	75
PteMel	1	0	2	0	0	1	0	0	3	14.2857	0	28.5714	0	0	14.2857	0	0	42.8571
TreQua	2	0	1	1	0	0	0	0	1	40	0	20	20	0	0	0	0	20
Sum	56	71	259	250	23	100	128	105	140
